# Supplementary material for: Identifying progression related disease risk modules based on the human subcellular signaling networks
Source: Royal Society of Chemistry journal article supplement (doi:10.1039/c4mb00482e), 2014-10-07
Supplement: c4mb00482e8.pdf [file c4mb00482e8.pdf]

### Supplementary Figure Captions

**Figure S1:** Bootstrapping for the PRDRMs of CAD in the HSSNs. **(A)**

Bootstrapping for GSE20680 case2/control. **(B)** Bootstrapping for GSE20680 case2/intermediate1. **(C)** Bootstrapping for GSE20680 intermediate1/control. FPR: False Positive Rate. TPR: True Positive Rate AUC: Area Under the Curve.

**Figure S2:** Five-fold cross-validation for the PRDRMs identified by PageRank of CAD in the HSSNs. **(A)** Five-fold cross-validation for GSE20680 case2/control.

**(B)** Five-fold cross-validation for GSE20680 case2/intermediate1. **(C)** Five-fold cross-validation for GSE20680 intermediate1/control. FPR: False Positive Rate. TPR: True Positive Rate AUC: Area Under the Curve.

**Figure S3:** Five-fold cross-validation for the PRDRMs identified by PageRank among the samples of CAD in the HSN. **(A)** Five-fold cross-validation for

GSE20680 case2/control. **(B)** Five-fold cross-validation for GSE20680 case2/intermediate1. **(C)** Five-fold cross-validation for GSE20680 intermediate1/control. FPR: False Positive Rate. TPR: True Positive Rate AUC: Area Under the Curve.

**Figure S4:** Five-fold cross-validation for the PRDRMs identified by CFinder of CAD in the HSSNs. **(A)** Five-fold cross-validation for GSE20680 case2/control.

**(B)** Five-fold cross-validation for GSE20680 case2/intermediate1. **(C)** Five-fold

cross-validation for GSE20680 intermediate1/control. FPR: False Positive Rate.

TPR: True Positive Rate AUC: Area Under the Curve.

**Figure S5:** Classification performances for the PRDRMs identified by CFinder of CAD in HSSNs. **(A)** The train set was GSE20680 case2/control, the test set was GSE20680 case2/intermediate1. **(B)** The train set was GSE20680 case2/control, the test set was GSE20680 intermediate1/control. **(C)** The train set was GSE20680 case2/control, the test set was GSE20681 case1/control. FPR: False Positive Rate. TPR: True Positive Rate AUC: Area Under the Curve.

**Figure S6:** Five-fold cross-validation for the PRDRMs identified by CFinder among the samples of CAD in the HSN. **(A)** Five-fold cross-validation for GSE20680 case2/control. **(B)** Five-fold cross-validation for GSE20680 case2/intermediate1. **(C)** Five-fold cross-validation for GSE20680 intermediate1/control. FPR: False Positive Rate. TPR: True Positive Rate AUC: Area Under the Curve.
