# Supplementary material for: Identifying progression related disease risk modules based on the human subcellular signaling networks
Source: Royal Society of Chemistry journal article supplement (doi:10.1039/c4mb00482e), 2014-10-07
Supplement: c4mb00482e9.pdf [file c4mb00482e9.pdf]

**Table S1:** The PRDRMS of CAD in HSSNs.

| Method     | Module | Genes of the module                                                                                                                                         | Localization          | JT test P-values |
|------------|--------|-------------------------------------------------------------------------------------------------------------------------------------------------------------|-----------------------|------------------|
| Our Method | M1     | NLRP1 PYDC1 PYCARD MEFV<br>CARD18 AIM2                                                                                                                      | Cytoplasm             | 0.0293           |
|            | M2     | MYL12B MYL9 SHROOM1 MYL6B<br>MYLPF MYO1F MYBPC3 MYH4<br>MYH6 MYH8 MYH11 MYL2 MYL3<br>MYL4 PPP1R12A PPP1R12B<br>SHROOM4 ROCK1 CDC42BPA<br>MYH13 MYOM1 ROCK2  | Cytoplasm             | 0.002            |
|            | M3     | EDNRB GNA11 GNAQ PMP2<br>PTGER3 RGS2 RGS4 TRHR TUB                                                                                                          | Cytoplasm             | 0.0097           |
|            | M4     | NCSTN NOTCH2 NOTCH3 NOTCH4<br>APH1A PLD1 PSENEN PSEN1<br>PSEN2 SORT1                                                                                        | Endoplasmic reticulum | 0.0414           |
|            | M5     | SMC4 KIF20A NDC80 CENPA SMC2<br>KIF2C KLF6 NCAPD3 NCAPH<br>DAPK2 RACGAP1 BIRC5 INCENP<br>ATF3 NSUN2 CDCA8 NCAPG SRPK1<br>PRC1 AURKB PTTG1 KIF23<br>NCAPD2   | Nucleus               | 0.0435           |
|            | M6     | PRDX4 TNFSF10 TNFRSF10D<br>TNFRSF10C                                                                                                                        | Nucleus               | 0.0232           |
|            | M7     | LTB4R HMHA1 ARG1 LBP NT5E<br>VIPR2                                                                                                                          | Plasma membrane       | 0.0032           |
|            | M8     | CYBB NCF2 NCF4 DUOX2 NOX3<br>NCF1                                                                                                                           | Plasma membrane       | 0.0097           |
|            | M9     | CR1 ENPEP ANPEP IL1B IL1R1<br>IL1RAP IL12RB2 IL1R2 CHRFB7A                                                                                                  | Plasma membrane       | 0.0377           |
|            | M10    | GNB5 CNGA1 CNGA3 GNAT1<br>GNAT2 GNGT2 RGS9BP PDE6A<br>PDE6C PDE6B CNGB3 RGS9                                                                                | Plasma membrane       | 0.0385           |
|            | M11    | FAS FASLG BID MAP2K4 TNFSF10<br>FADD TNFRSF10D TNFRSF10C<br>TNFRSF10B TNFRSF10A                                                                             | Plasma membrane       | 0.0428           |
|            | PM1    | EGFR MAPK3 MAPK1 JUN AR<br>PTK2B RHOA ROCK1 TNFRSF10D<br>PRKACA MAX IL1B PRKCA AKT1<br>MYBPC3 FADD RAC1 CTNNB1<br>NFKB1 SMAD3 MAPK8 HIF1A<br>CASP3 TP53 FAS | Cytoplasm             | 0.0407           |
|            | PM2    | FN1 NCSTN BACE1 ABL1 APP LRP1                                                                                                                               | Endoplasmic reticulum | 0.0359           |

|          |      |                                                                                                                                                             |                       |         |
|----------|------|-------------------------------------------------------------------------------------------------------------------------------------------------------------|-----------------------|---------|
|          |      | NOTCH2 NOTCH3 NOTCH4 PSEN1                                                                                                                                  | c reticulum           |         |
|          |      | SORT1 SHC1 TP53 TP63 BCAR1                                                                                                                                  |                       |         |
| PageRank | PM3  | RASGRF1 RASGRF2 RYR2 CACNA1E<br>CACNA1S                                                                                                                     | Endoplasmic reticulum | 0.0248  |
|          | PM4  | ITGB1 PRL VEGFA IFNAR2 IL1B<br>FGF2 CCL2 TGFB1 PHGDH ITGA1<br>C3 TNF LBP CSF2 MMP9 CDC42 IL6<br>IL4 IFNG F2 IL2 ITGAV STAT3<br>ROCK1 CTNNB1                 | Extracellular space   | 0.0471  |
|          | PM5  | CDKN1A MAPK8 AKT1 ESR1 JUN<br>NFKB1 EGFR MAPK1 PRKACA<br>RHOA IFNG MAPK3 SMAD4<br>CTNNB1 AR PRKCA TP53 IL1B<br>SMAD3 MYC TP63 CASP3 NOTCH3<br>CREBBP STK17A | Nucleus               | 0.0216  |
|          | PM6  | SRC GNA11 FYN CBL IL1B GRB2<br>AKT1 CDC42 GNAQ TNF GNAI3<br>PRKCA FADD GNAO1 FAS HRAS<br>RAC1 NOTCH2 PIK3CA PTPN11<br>RHOA CTNNB1 EGFR CD4 PIK3R1           | Plasma membrane       | 0.0185  |
|          | CM1  | XIAP HGF PTEN TP53                                                                                                                                          | Cytoplasm             | 0.0275  |
|          | CM2  | AKT1 AR CASP3 PTEN TERT                                                                                                                                     | Cytoplasm             | 0.0321  |
|          | CM3  | AR HSP90AA1 PTEN TERT TP53                                                                                                                                  | Cytoplasm             | 0.036   |
|          | CM4  | F2 F5 PROC PROS1                                                                                                                                            | Extracellular space   | 0.0003  |
|          | CM5  | CSF3 IL8 MMP9 SAA1 TNF                                                                                                                                      | Extracellular space   | 0.0071  |
|          | CM6  | IL8 IL17A MMP9 CXCL12 STAT3                                                                                                                                 | Extracellular space   | 0.00115 |
| CFinder  | CM7  | CSF2 CSF3 IL8 MMP9 STAT3 TNF                                                                                                                                | Extracellular space   | 0.0125  |
|          | CM8  | FGF2 FGFR4 MMP9 SPP1                                                                                                                                        | Extracellular space   | 0.0066  |
|          | CM9  | IL8 MMP9 TGFB1 VEGFA                                                                                                                                        | Extracellular space   | 0.0126  |
|          | CM10 | AR HSP90AA1 PTEN TERT TP53                                                                                                                                  | Nucleus               | 0.036   |
|          | CM11 | AKT1 AR HSP90AA1 PTEN TERT                                                                                                                                  | Nucleus               | 0.0318  |
|          | CM12 | EGF EGFR JAK2 SRC STAT1 STAT3                                                                                                                               | Nucleus               | 0.0293  |
|          | CM13 | EGFR HGF IGF1R PRKCA PTEN                                                                                                                                   | Plasma membrane       | 0.0204  |
|          | CM14 | FGF2 IL1B MMP9 TNF                                                                                                                                          | Plasma membrane       | 0.0338  |
|          | CM15 | NOTCH3 PSEN1 NCSTN APH1A<br>PSENE1 PSEN2                                                                                                                    | Golgi apparatus       | 0.0262  |
