# Supplementary material for: Identifying progression related disease risk modules based on the human subcellular signaling networks
Source: Royal Society of Chemistry journal article supplement (doi:10.1039/c4mb00482e), 2014-10-07
Supplement: c4mb00482e10.pdf [file c4mb00482e10.pdf]

**Table S2:** The PRDRMS of CAD in HSN.

| Method     | Module | Genes of the module                                                                                          | JT test P-values |
|------------|--------|--------------------------------------------------------------------------------------------------------------|------------------|
| Our Method | M'1    | SUGT1 NLRP3 NLRP6 CARD8 HSP90B1<br>CASP1                                                                     | 0.0256           |
|            | M'2    | NLRP1 PYDC1 PYCARD MEFV CARD18<br>AIM2                                                                       | 0.0293           |
|            | M'3    | CCNO SMUG1 NTHL1 S100A12 TDG<br>TPSAB1 MBD4                                                                  | 0.0008           |
| PageRank   | PM'1   | CDK4 ATF2 CREBBP CTNNB1 EP300<br>KLK3 AR SMAD2 SMAD3 SMAD4 MAX<br>MYB MYC PPARG RXRA RXRB RXRG<br>TGFB2 TP53 | 0.0362           |
|            | PM'2   | FAS TP53 TP63 FADD TNFRSF10B                                                                                 | 0.0417           |
| CFinder    | CM'1   | CREB1 EPO HIF1A VEGFA COPS5                                                                                  | 0.0161           |
|            | CM'2   | FGF4 FGFR4 SDC2 SPP1                                                                                         | 0.017            |
|            | CM'3   | ANGPT1 MAPK14 HGF TNF                                                                                        | 0.0121           |
|            | CM'4   | FGFR4 SDC2 SPP1 FGF23                                                                                        | 0.0167           |
|            | CM'5   | IFNG IL8 IL10 TLR2                                                                                           | 0.025            |
|            | CM'6   | HGF IGF1R PIK3CA PTEN                                                                                        | 0.0209           |
|            | CM'7   | FGF2 FGFR4 SDC2 SPP1                                                                                         | 0.0234           |
|            | CM'8   | CSF3 IFNG JAK2 CXCL12                                                                                        | 0.005            |
|            | CM'9   | GRB2 IL6R JAK2 PTPN11                                                                                        | 0.0177           |
|            | CM'10  | IFNG IL12B JAK2 TNF                                                                                          | 0.0118           |
|            | CM'11  | CCR5 JAK2 CXCL12 CXCR4                                                                                       | 0.0323           |
|            | CM'12  | HSP90AA1 KDR ROCK1 VEGFA                                                                                     | 0.025            |
|            | CM'13  | EGFR ICAM1 IL8 NFATC1                                                                                        | 0.0268           |
|            | CM'14  | JAK2 PDGFB PTPN11 STAT1                                                                                      | 0.0276           |
|            | CM'15  | HGF MAPK1 PTGS2 TGFB1                                                                                        | 0.0129           |
|            | CM'16  | MAPK14 EGFR FGF2 STAT1                                                                                       | 0.0292           |
|            | CM'17  | JAK2 PDGFRB PTPN11 STAT1                                                                                     | 0.0158           |
|            | CM'18  | IFNG JAK2 CXCL12 STAT3                                                                                       | 0.0157           |
