# Supplementary material for: Identifying progression related disease risk modules based on the human subcellular signaling networks
Source: Royal Society of Chemistry journal article supplement (doi:10.1039/c4mb00482e), 2014-10-07
Supplement: c4mb00482e11.pdf [file c4mb00482e11.pdf]

**Table S3:** The enriched KEGG pathways for the PRDRMs of CAD in HSN

and p-values adjusted with Benjamini-Hochberg.

| KEGG pathway                        | module | P-values |
|-------------------------------------|--------|----------|
| NOD-like receptor signaling pathway | M'1    | 1.0E-7   |
| NOD-like receptor signaling pathway | M'2    | 2.0E-7   |
| Base excision repair                | M'3    | 3.0E-7   |
