# Supplementary material for: Identifying progression related disease risk modules based on the human subcellular signaling networks
Source: Royal Society of Chemistry journal article supplement (doi:10.1039/c4mb00482e), 2014-10-07
Supplement: c4mb00482e12.pdf [file c4mb00482e12.pdf]

**Table S4:** The PRDRMs of Breast cancer in HSSNs.

| Module | Genes of module                                                                                                                                                                                                 | Localization        | JT test P-values |
|--------|-----------------------------------------------------------------------------------------------------------------------------------------------------------------------------------------------------------------|---------------------|------------------|
| BM1    | VPS37A VPS28 VPS37C TSG101 VPS37B                                                                                                                                                                               | Cytoplasm           | 0.0307           |
| BM2    | RAD50 CDKN2D MRE11A ATM BARD1<br>RBBP8 BRCA1 TP53BP1 UBE2N MDC1                                                                                                                                                 | Cytoplasm           | 0.0339           |
| BM3    | LZTS1 CRT2 SIK2 SIK3 NEIL2 HDLBP<br>ACACA MAP2 MAPT MBP CAB39 MST4<br>PFDN5 PRKAG3 STRADB MARK4<br>SMARCD3 SSB STK11 TSNAX BRSK1<br>PPFIA1 BRSK2 STRADA TRIP4 TRIM14                                            | Cytoplasm           | 0.0085           |
| BM4    | ADA UBE4B DCP1B AIF1 FBXO45 HAGH<br>WVOX RNF43 BRCA2 TP73 PEA15 DEDD                                                                                                                                            | Cytoplasm           | 0.0407           |
| BM5    | FBLN5 LEFTY1 CLU COL15A1 CTGF DCN<br>ADAMTS16 AGT MMRN1 ALPP IGFBP2<br>IL13 INHBB INHBC LOX NELL2 NODAL<br>OMD TNFRSF11B PDGFA PDK1 ASPN<br>SFTPB BMP3 SPARC TDGF1 TGFB1 TGFB3<br>LEFTY2 TGFB1 THPO TIMP3 INHBE | Extracellular space | 0.00001          |
| BM6    | TNIP1 HOXB13 DACH1 DAPK3 ETV5<br>FKBP4 DAAM1 NCOA6 RAD54L2 PATZ1<br>SPDEF PELP1 FOXP1 SLC25A4 PSMC3IP<br>DNAJA1 AR PA2G4 PRDX1 ZMIZ1<br>KIAA1967 NSD1 SUMO2 SVIL TMF1<br>NCOA4 EPPK1 RNF14 KDM4A CDK11B         | Nucleus             | 0.0287           |
| BM7    | FOXO6 POP7 RALBP1 C19orf21 TCEAL6<br>DNMT1 AKT1 AKT2 NOC2L ERAL1<br>DNAJB2 PDE3A PIK3CG BCL11A PPP2CA<br>CHFR NUP133 AVEN RARB RARG BRD2<br>RPS6KB2 TEAD1 THRA TIAM1 IRS2<br>TBC1D4                             | Nucleus             | 0.0008           |
| BM8    | RAD50 TREX1 H2AFX MRE11A NBN ATM<br>POLH ATR PPP4C BARD1 RBBP8 BRCA1<br>TERF1 TP53BP1 UBE2N NABP2 BAP1<br>RNF8 MDC1                                                                                             | Nucleus             | 0.0012           |
| BM9    | DSCAM ESR1 ABCA3 PDZK1 STRN<br>CCDC62 EBAG9 GREB1                                                                                                                                                               | Plasma membrane     | 0.00001          |
