# Supplementary material for: Identifying progression related disease risk modules based on the human subcellular signaling networks
Source: Royal Society of Chemistry journal article supplement (doi:10.1039/c4mb00482e), 2014-10-07
Supplement: c4mb00482e13.pdf [file c4mb00482e13.pdf]

**Table S5:** The PRDRMs of Breast cancer in the HSN.

| Module | Genes of module                                                                                                                                                                                                  | JT test P-values |
|--------|------------------------------------------------------------------------------------------------------------------------------------------------------------------------------------------------------------------|------------------|
| BM'1   | CDK9 POLR3F POLR3A LZTS1 POLR3H NELFB GTF2F2<br>NFIA NFIB NFIC NFIX NELFCD POLR2D POLR2E POLR2F<br>POLR2G POLR2H POLR2I POLR2K POLR2L POLR3B<br>POLR3E POLR3D SSB SUPT4H1 NELFA NELFE CCNT1<br>CCNT2 CTDP1 HMGN3 | 0.002            |
| BM'2   | CD160 KIR3DL3 ISG20 KIR2DL1 KIR2DL2 KIR2DL3<br>KIR2DL4 KIR2DS1 KIR2DS3 KIR2DS4 KIR2DS5 KIR3DL1<br>KIR3DL2 KLRC1 KLRC2 KLRC3 KLRD1 KIR2DL5A KLRC4                                                                 | 0.0014           |
| BM'3   | RRAGB EIF3M RRAGA EIF5 CDK19 MTOR EIF3K EIF3E<br>EIF3L RRN3 RPTOR RRAGD RHEB CLIP1 RRAGC MLST8<br>DEPTOR AKT1S1 EIF3A EIF3B EIF3C EIF3D EIF3F EIF3G<br>EIF3H EIF3I EIF3J ULK2                                    | 0.0001           |
| BM'4   | NAMPT CCL26 ESAT DARC CHIA CXCL1 CXCL9 PF4 PON1<br>ACE2 CCL2 CCL13 CX3CL1 ZC3H12A CD163                                                                                                                          | 0.0343           |
| BM'5   | TACC3 TRIOBP TPX2 MYCBP2 CUL9 ZZEF1 UBE2S<br>NUMA1 OAZ1 OCA2 ODC1 AZIN1 AURKAIP1 KIF15<br>AURKA HECTD3 BORA NDEL1 CDC14B HERC2 DLGAP5<br>CUL7                                                                    | 0.00001          |
| BM'6   | FRA16A ELP2 STAT1 STAT2 STAT3 STAT5A STAT5B                                                                                                                                                                      | 0.0424           |
| BM'7   | CDR2 OR10A4 DBNL HLA-DOA HLA-DOB HLA-DPA1<br>HLA-DPB1 HLA-DQA1 HLA-DQA2 HLA-DQB1 HLA-DRA<br>HLA-DRB1 HLA-DRB3 HLA-DRB4 HLA-DRB5 PAG1 B2M<br>PTPN3 TRA TRB IV UNC119 CD3D CD3E CD3G CD247<br>CD4 CD8A CD8B CD28   | 0.0028           |
| BM'8   | SMC4 KIF20A NDC80 CENPA SMC2 KIF2C KLF6 DES<br>NCAPD3 NCAPH DAPK2 RACGAP1 BIRC5 INCENP ATF3<br>PEBP1 NSUN2 CDCA8 NCAPG AURKC PRC1 AURKB<br>PTTG1 KIF23 NCAPD2                                                    | 0.00001          |
| BM'9   | STAM2 GNLV SHE EGR2 CELA1 FCAR IKZF3 SGMS1<br>NME2P1 HYAL1 IL2 IL2RA IL2RB IL2RG KRT19 SHD<br>ALPK3 PZP SERPINB3 SRL TWIST1 TNFRSF4 SCGB1A1<br>UGCG ALPK1 STAM DOK2 SHF NMI CD80 CD86                            | 0.0007           |
