# Supplementary figures and images for: Identifying progression related disease risk modules based on the human subcellular signaling networks
Source: Royal Society of Chemistry journal article supplement (doi:10.1039/c4mb00482e), 2014-10-07

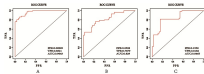

Supplement: c4mb00482e6.pdf [file c4mb00482e6.pdf]
